# Supplementary figures and images for: Isolation and Characterization of Bacterial Endophytes from Small Nodules of Field-Grown Peanut
Source: MDPI journal article supplement (doi:10.3390/microorganisms11081941), 2023-07-29

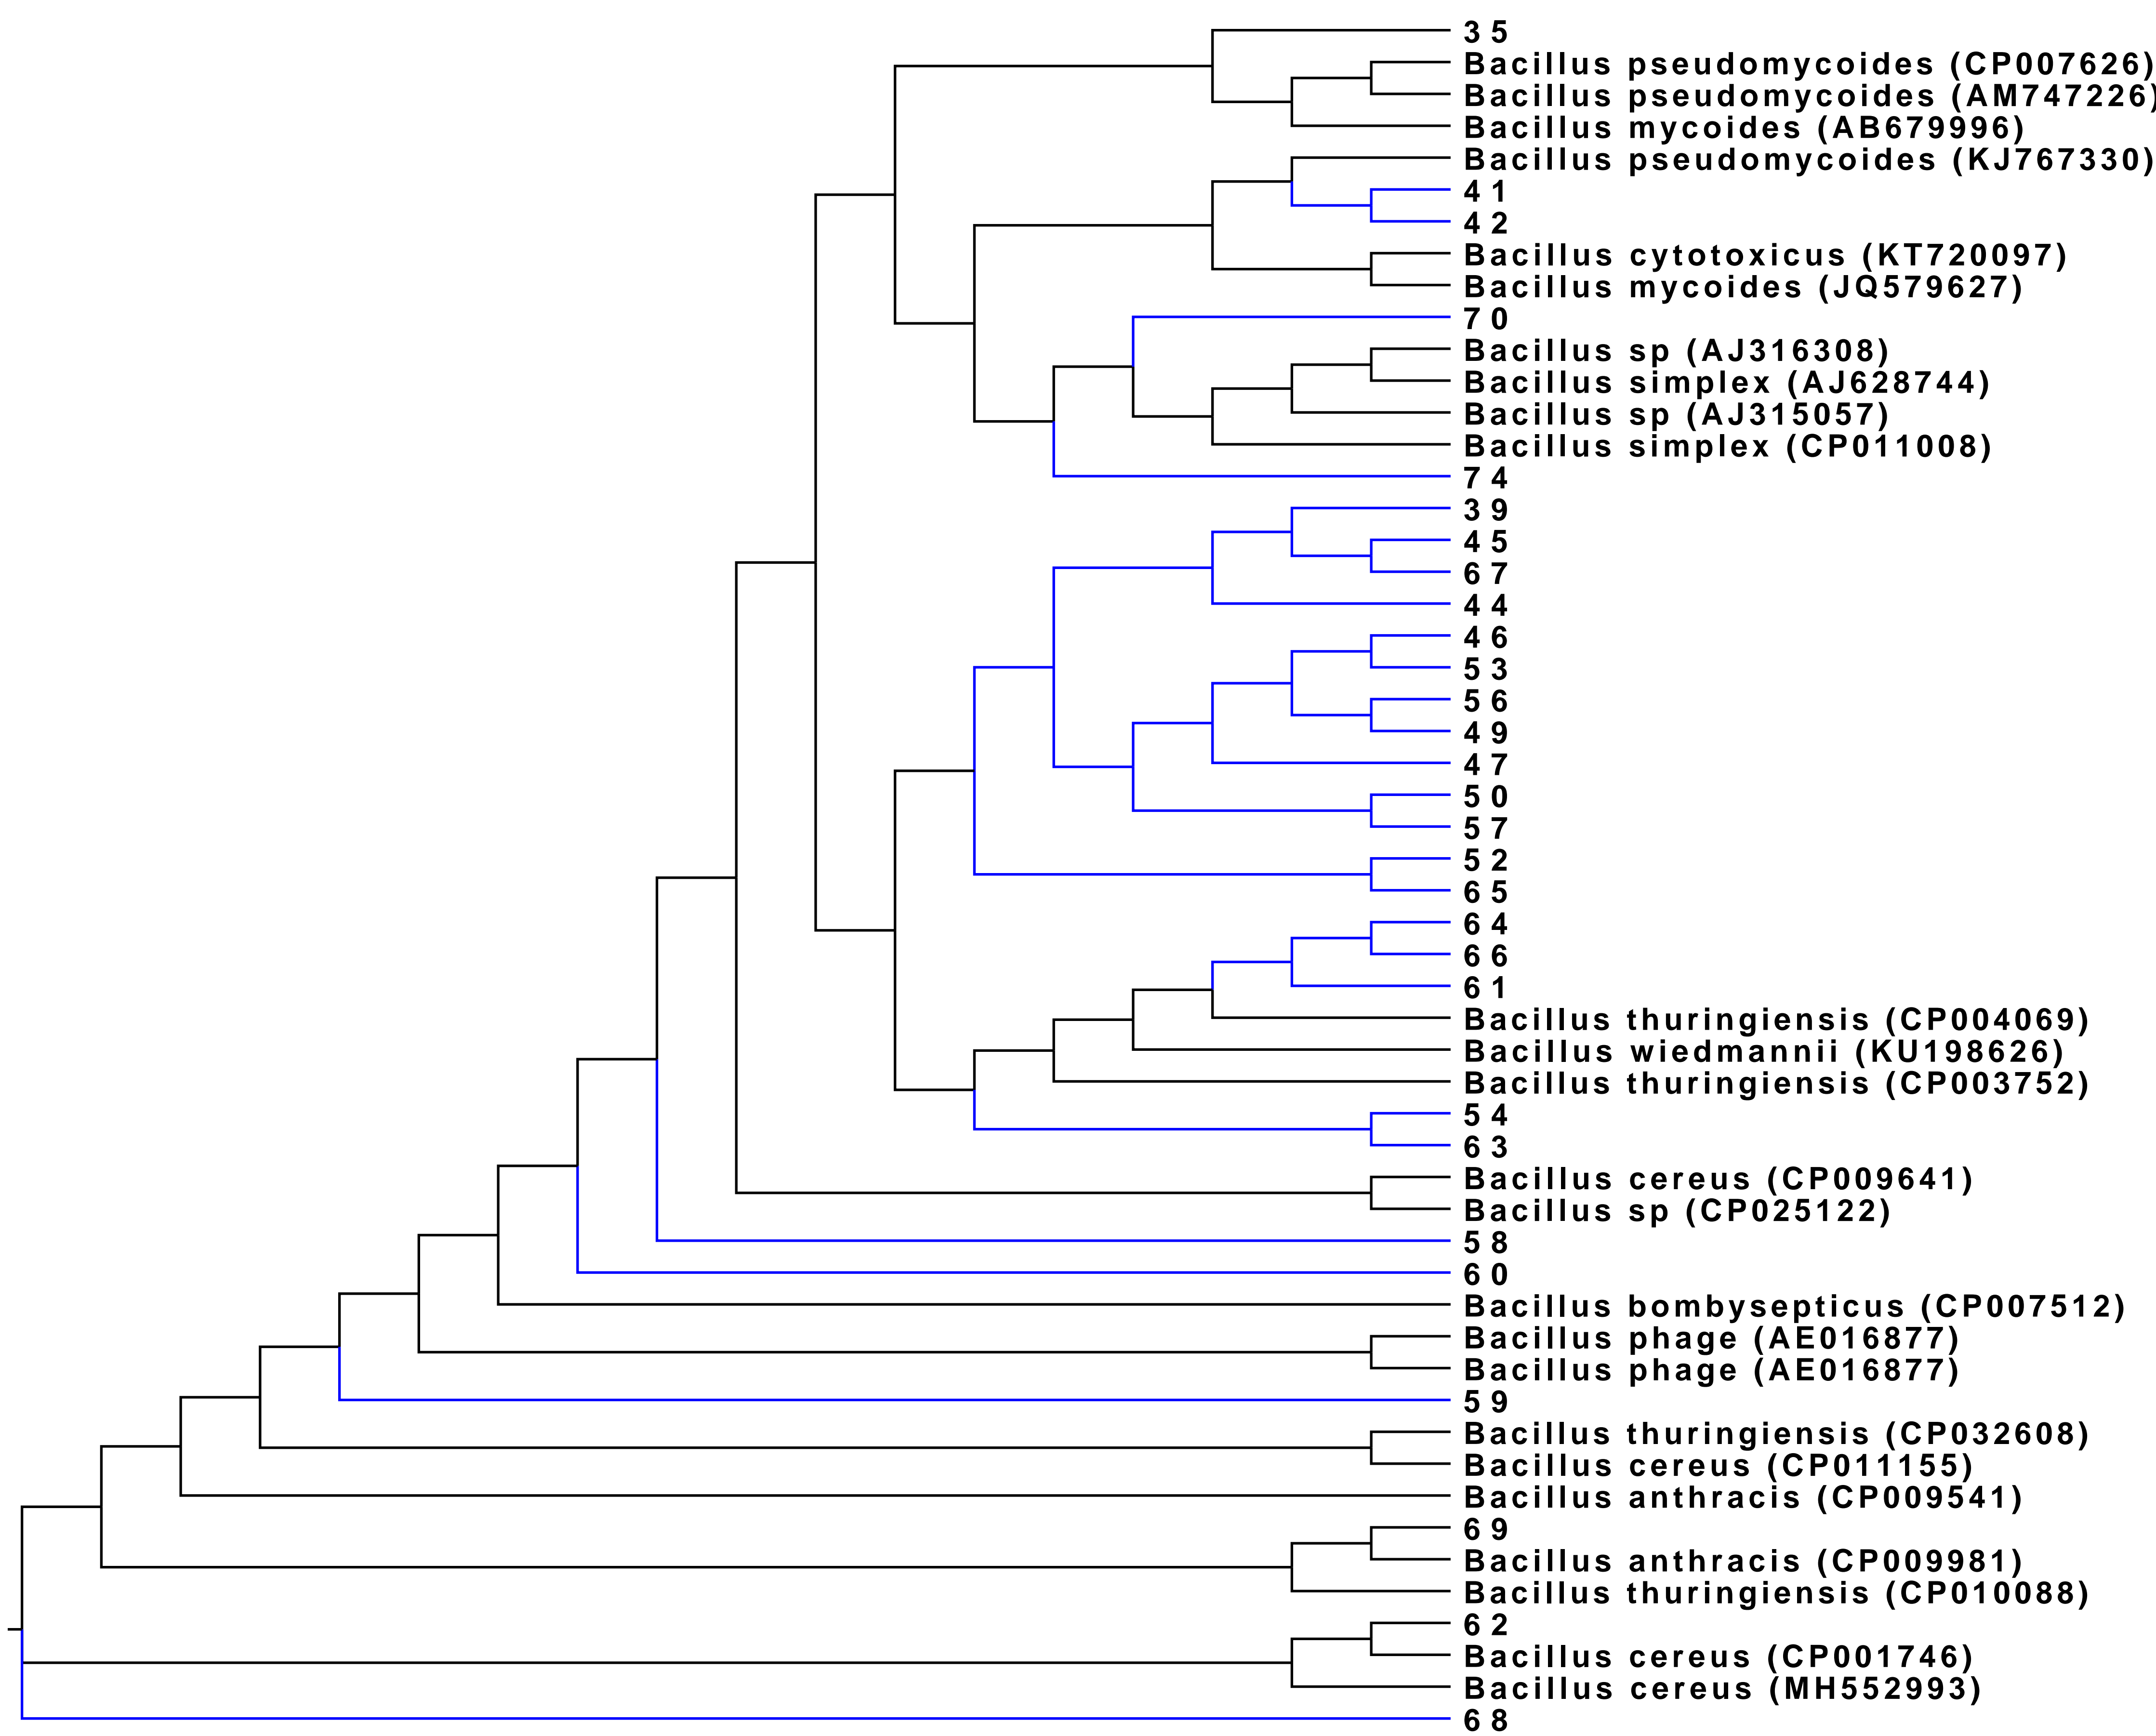

Supplement: s1 [file s1]
